# Supplementary material
Source: PubMed Central journal article supplement (PMC4860092)
Supplement: NIHMS766298-supplement-1.pdf [file NIHMS766298-supplement-1.pdf]

Supplementary information

## **Nod2-mediated recognition of the microbiota is critical for mucosal adjuvant activity of cholera toxin**

Donghyun Kim<sup>1</sup>, Yun-Gi Kim<sup>1</sup>, Sang-Uk Seo<sup>1</sup>, Dong-Jae Kim<sup>1</sup>, Nobuhiko Kamada<sup>2</sup>, Dave Prescott<sup>3</sup>, Dana J. Philpott<sup>3</sup>, Philip Rosenstiel<sup>4</sup>, Naohiro Inohara<sup>1</sup>, and Gabriel Núñez<sup>1</sup>

<sup>1</sup>Department of Pathology and Comprehensive Cancer Center, University of Michigan Medical School, Ann Arbor, Michigan, USA

<sup>2</sup>Division of Gastroenterology, Department of Internal Medicine, University of Michigan Medical School, Ann Arbor, Michigan, USA

<sup>3</sup>Department of Immunology, University of Toronto, Toronto, Canada.

<sup>4</sup>Institute of Clinical Molecular Biology; University of Kiel, Kiel, Germany.

Corresponding author: Gabriel Núñez

Email: gabriel.nunez@umich.edu

**This file includes  
Supplementary figures 1 to 13**

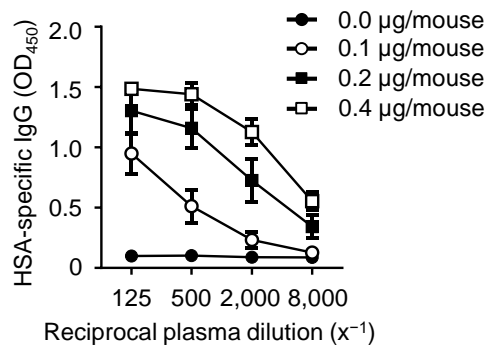

**Supplementary Figure 1. Antigen-specific IgG production induced by various amounts of cholera toxin.** Mice were intranasally immunized with 30  $\mu\text{g}$  of HSA and various amounts of CT. The amounts of HSA-specific IgG were analyzed in plasma on day 14 post-immunization. Data are shown as mean  $\pm$  s.e.m.

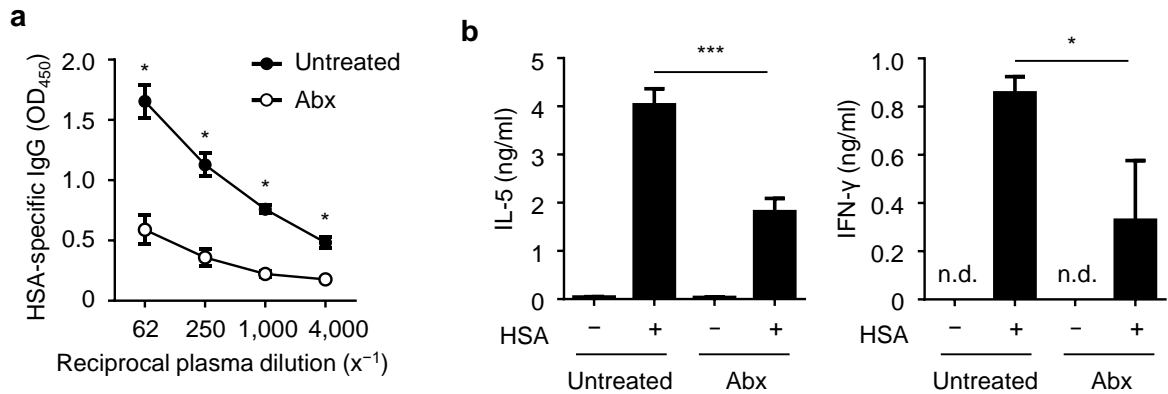

**Supplementary Figure 2. Symbiotic bacteria are critical for oral immunization with antigen and cholera toxin.** (a) The amounts of HSA-specific IgG were analyzed in plasma obtained from antibiotic (Abx)-treated mice ( $n = 5$ ) and untreated control mice ( $n = 4$ ) on day 14 after oral immunization with 10 mg of HSA and 10  $\mu\text{g}$  of CT. (b) Splenocytes were isolated from Abx-treated mice and untreated mice on day 14 post-immunization, and then restimulated with or without 500  $\mu\text{g}/\text{ml}$  of HSA in triplicate cultures for 4 d. The production of IFN- $\gamma$  and IL-5 was examined in supernatants of restimulated splenocytes. The results are representative of at least two independent experiments. Values represent mean  $\pm$  s.e.m. (a) or mean of three technical replicates  $\pm$  s.d. (b). \* $P < 0.05$  and \*\*\* $P < 0.001$  by Mann-Whitney test (a) and by Student's  $t$ -test (b). n.d., not detected.

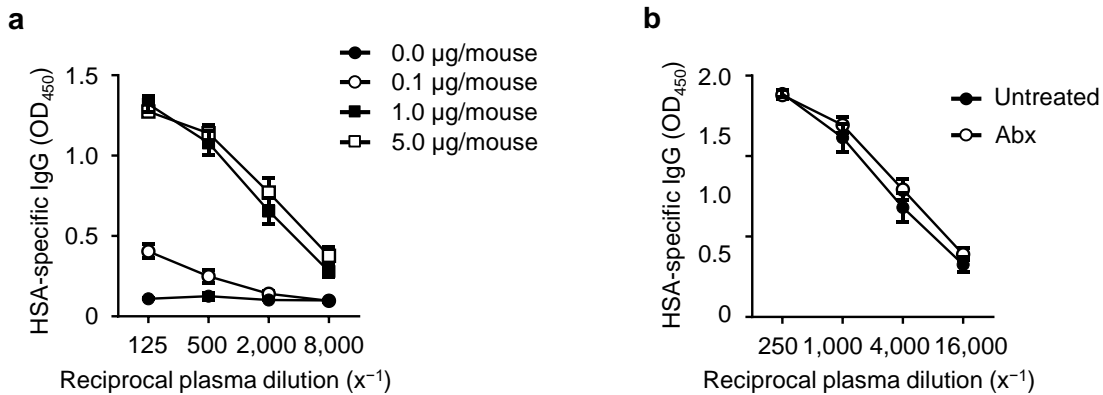

**Supplementary Figure 3. Symbiotic bacteria are dispensable for antigen-specific IgG response induced by intraperitoneal immunization with antigen and cholera toxin.** Mice were intraperitoneally immunized with 100  $\mu\text{l}$  of PBS containing 100  $\mu\text{g}$  of HSA and various amounts of CT (**a**) or 1  $\mu\text{g}$  of CT (**b**). (**a**, **b**) The amounts of HSA-specific IgG were analyzed in plasma on day 14 post-immunization. (**b**) Antibiotic-treated mice ( $n = 5$ ) were given antibiotic cocktail in the drinking water ad libitum from 2 weeks prior to immunization while control animals ( $n = 5$ ) were provided with normal water. Values represent mean  $\pm$  s.e.m.

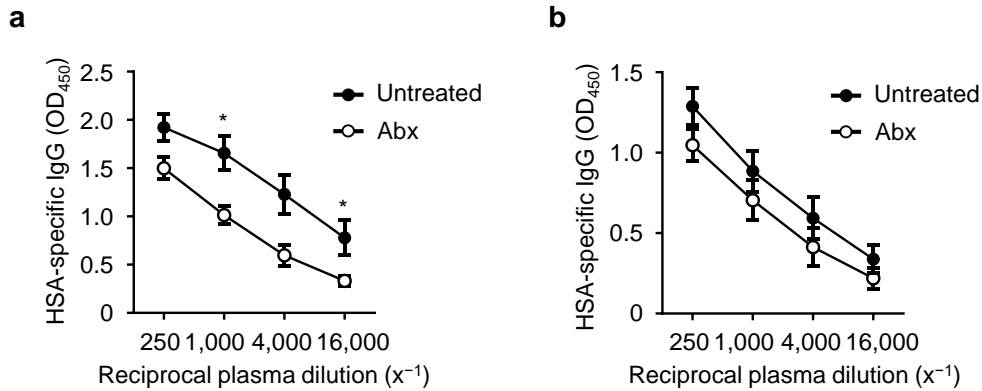

**Supplementary Figure 4. Symbiotic bacteria enhance antigen-specific IgG production after nasal immunization with CpG, but not MALP-2.** The amounts of HSA-specific IgG in plasma were analyzed in Abx-treated and untreated mice on day 14 after intranasal immunization with 30  $\mu$ g of HSA and 10  $\mu$ g of CpG (*n* = 4 or 5 per group) (a) or 0.5  $\mu$ g of MALP-2 (*n* = 5 or 7 per group) (b). Values represent mean  $\pm$  s.e.m. \**P* < 0.05 by Mann-Whitney test.

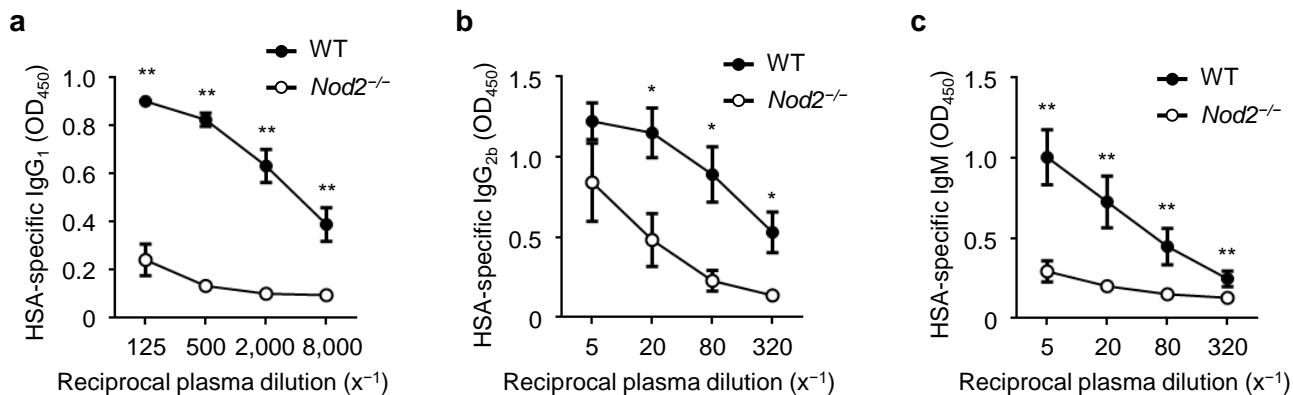

**Supplementary Figure 5. Antigen-specific IgG<sub>1</sub>, IgG<sub>2b</sub>, and IgM induced by nasal immunization with HSA and cholera toxin are decreased in *Nod2* deficient mice.**

The amounts of HSA-specific IgG<sub>1</sub>, IgG<sub>2b</sub>, and IgM were measured in plasma from *Nod2*<sup>-/-</sup> and WT mice ( $n = 5$  per group) on day 14 after intranasal immunization. Data shown represent mean  $\pm$  s.e.m. \* $P < 0.05$  and \*\* $P < 0.01$  by Mann-Whitney test.

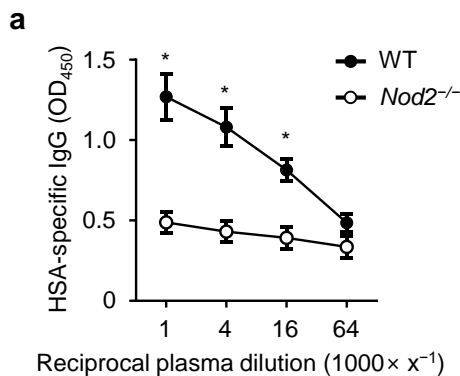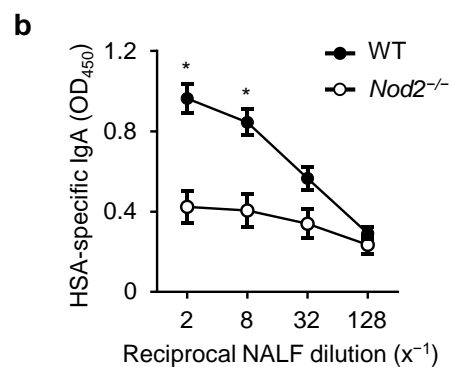

**Supplementary Figure 6. *Nod2* is important for systemic production of IgG and local production of IgA induced by nasal immunization with high dose of cholera toxin.** WT and *Nod2*<sup>-/-</sup> mice ( $n = 4$  per group) were intranasally immunized with 100  $\mu$ g of HSA and 1  $\mu$ g of CT. HSA-specific IgG in plasma (**a**) and HSA-specific IgA in NALF (**b**) were measured on day 14 post-immunization. Data represent mean  $\pm$  s.e.m (**a, b**) \* $P < 0.05$  by Mann-Whitney test.

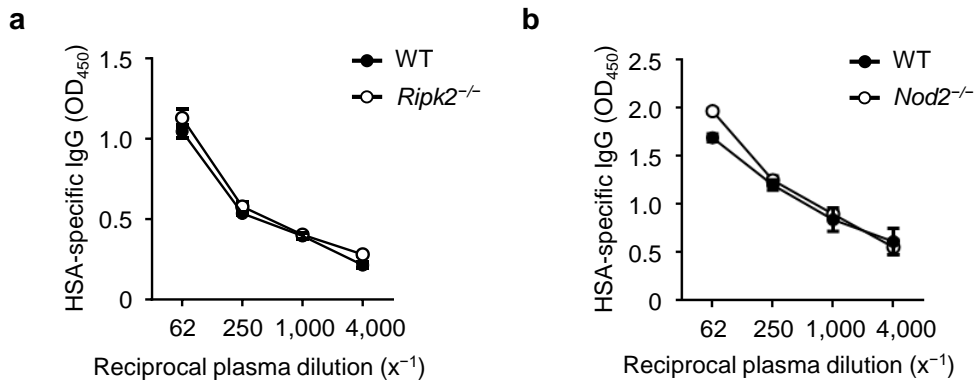

**Supplementary Figure 7. *Ripk2* and *Nod2* are dispensable for intraperitoneal immunization with cholera toxin or alum.** WT and *Ripk2*<sup>-/-</sup> (**a**) or *Nod2*<sup>-/-</sup> (**b**) mice ( $n = 3 - 5$  per group) were intraperitoneally immunized with 100  $\mu$ l of PBS containing 100  $\mu$ g of HSA and 1  $\mu$ g of CT (**a**) or 30  $\mu$ g of HSA and 100  $\mu$ l of alum (**b**), respectively. HSA-specific IgG was measured in plasma on day 14 post-immunization. Data represent mean  $\pm$  s.e.m.



**a**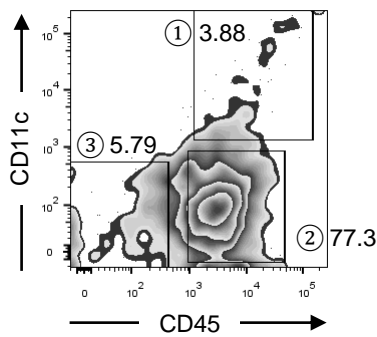**b**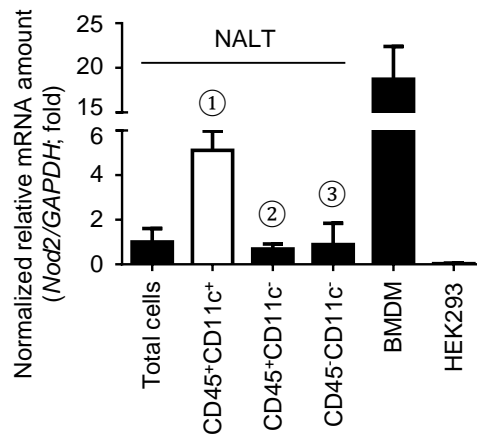

**Supplementary Figure 8. *Nod2* expression in NALT cell populations.** (a) Cells isolated from NALT were sorted by flow cytometry as indicated. (b) Analysis of *Nod2* expression in mRNA from total cells and sorted NALT cells was performed by real-time qPCR. Bone marrow-derived macrophages (BMDM) and HEK293 cells are shown as positive and negative controls, respectively. *Gapdh* gene expression was used for data normalization.

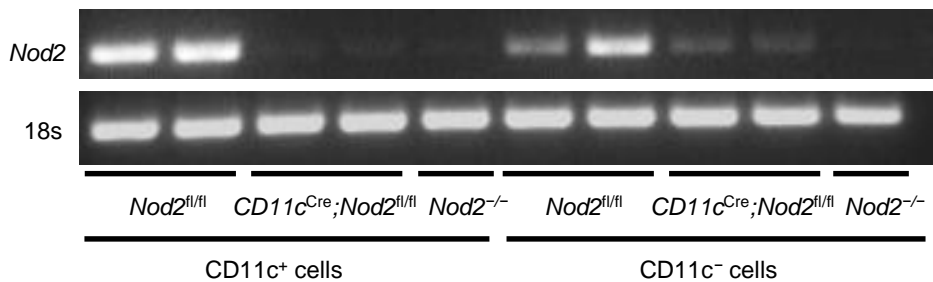

**Supplementary Figure 9. Verification of CD11c positive cell-specific knockout of *Nod2*.** Total splenocytes were isolated from *CD11c*<sup>Cre</sup>;*Nod2*<sup>fl/fl</sup>, their littermate *Nod2*<sup>fl/fl</sup> and whole-body *Nod2*<sup>-/-</sup> mice. CD11c-positive and CD11c-negative cells were isolated using a magnetic sorting kit. RT-PCR was performed on total RNA isolated from purified cells using primers spanning exons 2 and 3 of the *Nod2* transcript.

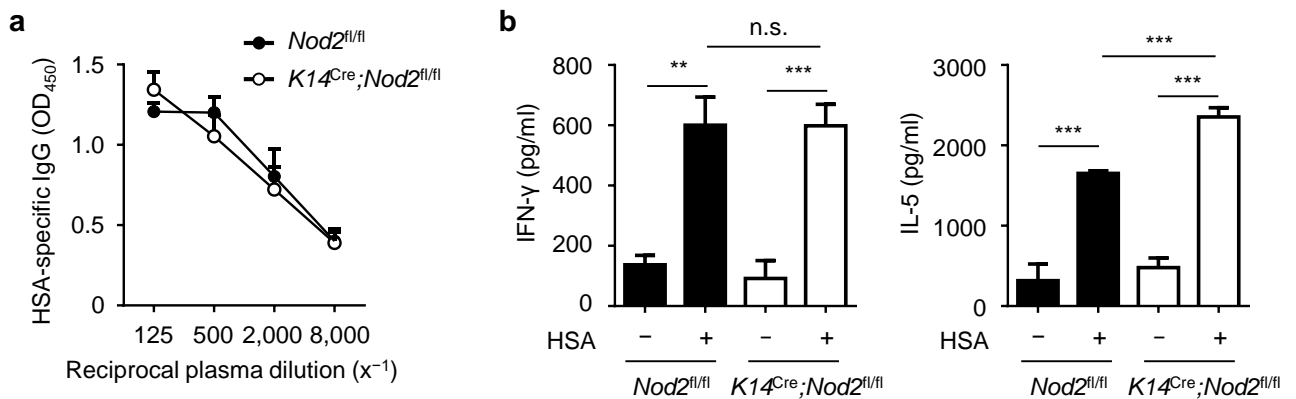

**Supplementary Figure 10. Nod2 in epithelial cells is dispensable for adjuvant**

**activity of cholera toxin.** (a) HSA-specific IgG was measured in plasma from

immunized *K14*<sup>Cre</sup>;*Nod2*<sup>fl/fl</sup> and their littermate *Nod2*<sup>fl/fl</sup> mice ( $n = 4$  per group) on day 14

post-immunization. (b) Splenocytes were isolated from *K14*<sup>Cre</sup>;*Nod2*<sup>fl/fl</sup> and *Nod2*<sup>fl/fl</sup> mice on day 14 post-immunization, and then restimulated with or without HSA for 4 d.

Concentrations of IFN- $\gamma$  and IL-5 were determined in the supernatants of restimulated splenocytes. Results are representative of at least two independent experiments. Data

are shown as mean  $\pm$  s.e.m. (a) or  $\pm$  s.d. (b). \*\* $P < 0.01$  and \*\*\* $P < 0.001$  by Mann-

Whitney test (a) and by Student's *t*-test (b) n.s.; not significant.

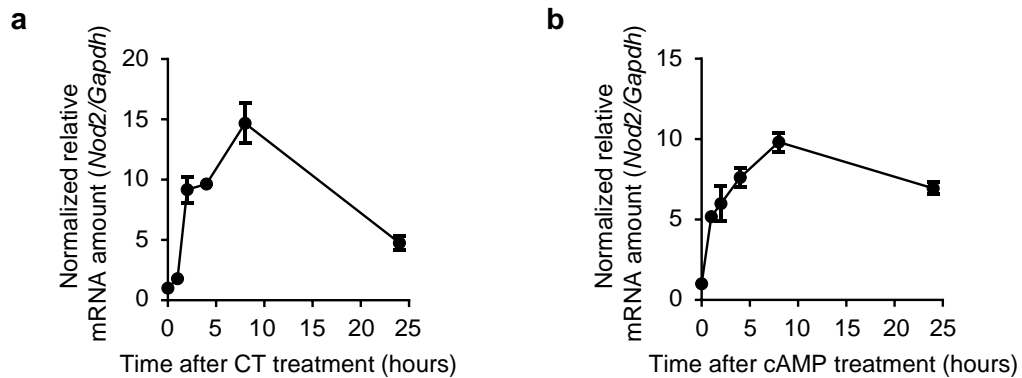

**Supplementary Figure 11. Cholera toxin and cAMP induce the expression of *Nod2* mRNA in DCs.** BMDCs were treated with 0.5  $\mu\text{g/ml}$  of CT (**a**) and 100  $\mu\text{M}$  of cAMP (**b**) in triplicate cultures and total RNA was prepared at various time-points, followed by real-time qPCR analysis using specific primer sets for *Nod2* and *Gapdh*. *Gapdh* was used for data normalization. Results are representative of two independent experiments. Data shown represent mean  $\pm$  s.d.

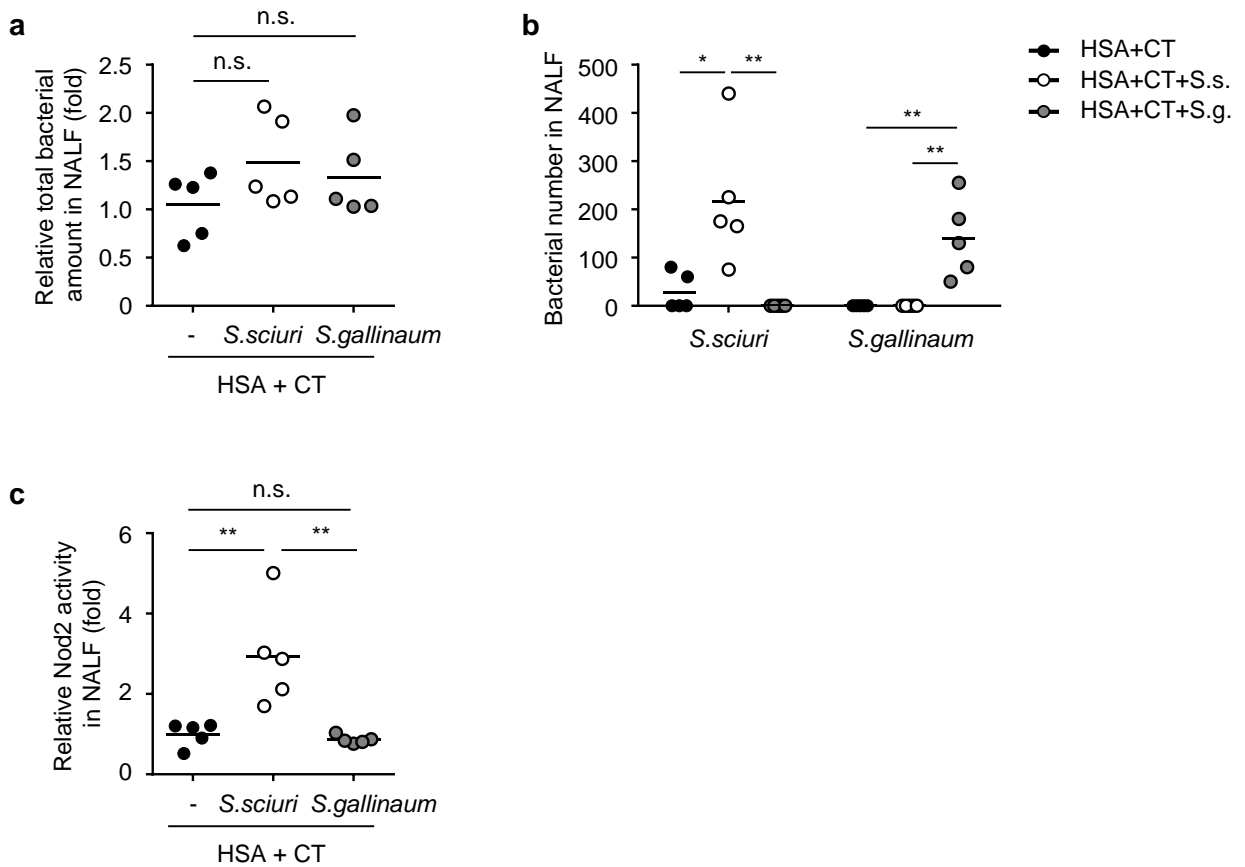

**Supplementary Figure 12. Bacterial colonization and Nod2-stimulatory activity in the nasal cavity of mice stimulated intranasally with HSA, cholera toxin and indicated bacteria.** SPF mice (each group  $n = 5$ ) were intranasally immunized with HSA and CT together with  $5 \times 10^5$  c.f.u./mouse of live *S. sciuri* or *S. gallinarum* and, 2 weeks later, NALFs were collected from each mouse. **(a)** Total bacterial colonization was measured by real-time qPCR analysis using total DNA obtained from NALF and a set of universal 16S rDNA sequence primers **(b)** The numbers of *S. sciuri* and *S. gallinarum* in the NALF were calculated based on distinct colony morphology after culturing NALF bacteria on BHI agar plates. The identity of selected colonies was verified by 16S rDNA sequencing of V3-V4 regions. **(c)** Nod2-stimulatory activity in NALF from SPF, *S. sciuri*, or *S. gallinarum*-treated mice. Each dot represents an individual mouse and the mean value is displayed by a line. \* $P < 0.05$  and \*\* $P < 0.01$  by Mann-Whitney test. n.s.; not significant.

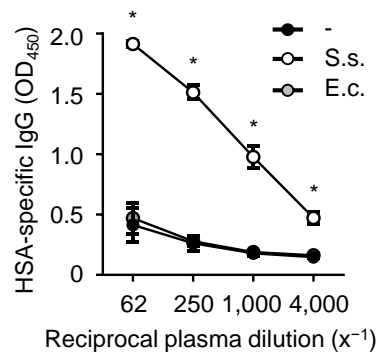

**Supplementary Figure 13. Antigen-specific IgG responses in germ-free mice stimulated with UV-inactivated bacteria.** GF mice ( $n = 3$  or  $4$  per group) were intranasally immunized with HSA and CT together with  $5 \times 10^3$  c.f.u./mouse of UV-inactivated *S. sciuri* or *E. coli*. The amounts of HSA-specific IgG were analyzed in plasma on day 14 post-immunization. Data are shown as mean  $\pm$  s.e.m. \* $P < 0.05$  by Mann-Whitney.
